# Supplementary material for: Periconceptional Maternal Diet Characterized by High Glycemic Loading Is Associated with Offspring Behavior in NEST
Source: MDPI journal article supplement (doi:10.3390/nu13093180), 2021-09-13
Supplement: s1 [file s1]

| DMR        | Location | Relevant Adverse Health Outcomes                                                                                                       |
|------------|----------|----------------------------------------------------------------------------------------------------------------------------------------|
| PLAGL1     | 6q24.2   | Transient neonatal diabetes mellitus, neonatal diabetes, imprinted gene network regulatory hub                                         |
| MEST       | 7q32.2   | Posterior cerebral artery infarction, cancer                                                                                           |
| SGCE/PEG10 | 7q21.3   | Silver Russell syndrome, myoclonic dystonia (SGCE), cancer (PEG10)                                                                     |
| IGF2       | 11p15.5  | Silver Russell syndrome, Beckwith-Wiedemann syndrome, intrauterine growth restriction, obesity, metabolic syndrome, cancer             |
| H19        | 11p15.5  | Silver Russell syndrome, Beckwith-Wiedemann syndrome, cancer, imprinted gene network regulatory hub                                    |
| MEG3       | 14q32.2  | Age at menarche, Temple syndrome, Kagami-Ogata syndrome, recurrent pregnancy loss, autism, Parkinson's disease, osteoarthritis, cancer |
| MEG3-IG    | 14q32.2  | Central precocious puberty, Temple syndrome, Kagami-Ogata syndrome                                                                     |
| NNAT       | 20q11.23 | Megalencephalic leukoencephalopathy with subcortical cysts 1, myoclonic epilepsy of Lafora                                             |

**Table S1.** Interrogated imprint control regions and their associations with human disease and health outcomes.

# Concurrent Modeling of GL and MD Adjusting for All Covariates for Males

GL\_T3vT1 MD\_T3vT1

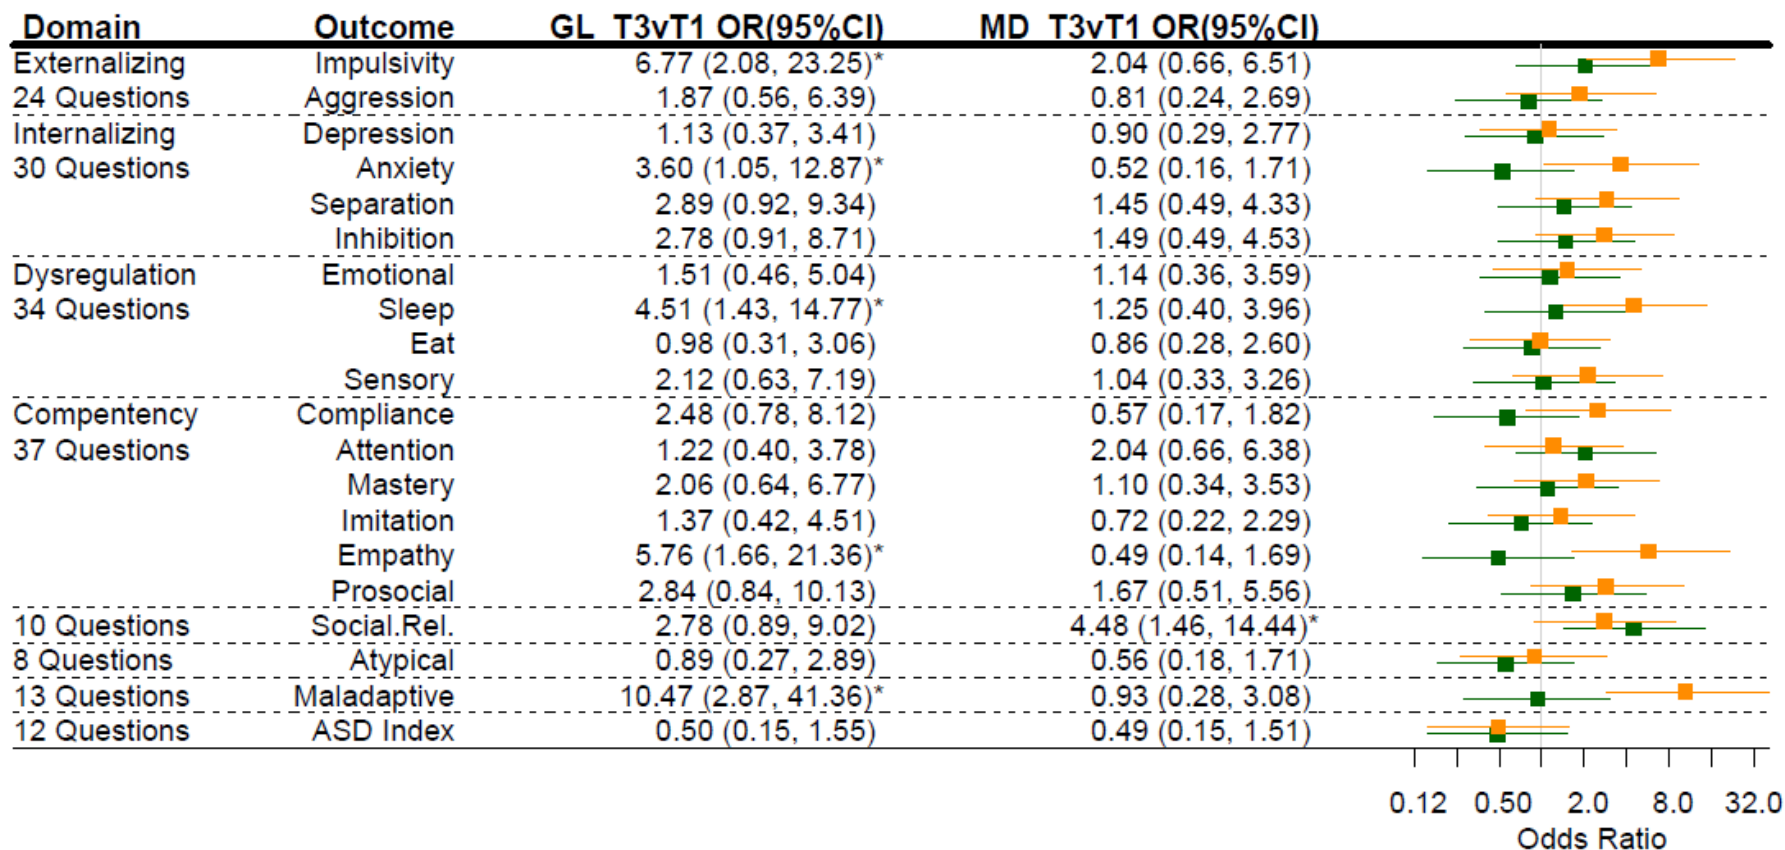

**Figure S1.** Maternal Glycemic Loading Diet and Child Behavior Outcomes in Males. For the 3<sup>rd</sup> tertile of maternal Glycemic Loading compared to the 1<sup>st</sup> (referent), the odds ratio (95% confidence interval) represents the risk of being in a higher tertile of behavioral outcome. Odds ratios (95%CI) are plotted for glycemic loading (orange) and Mediterranean diet (green). Estimates were adjusted for breastfeeding at least 3 months, age of child at behavioral assessment, maternal fiber intake, total calories, folate, education, diabetes, obesity, smoking, race, and age, as well as child parity, premature birth, weight. \*p < 0.05.

# Concurrent Modeling of GL and MD Adjusting for All Covariates for Females

GL\_T3vT1 MD\_T3vT1

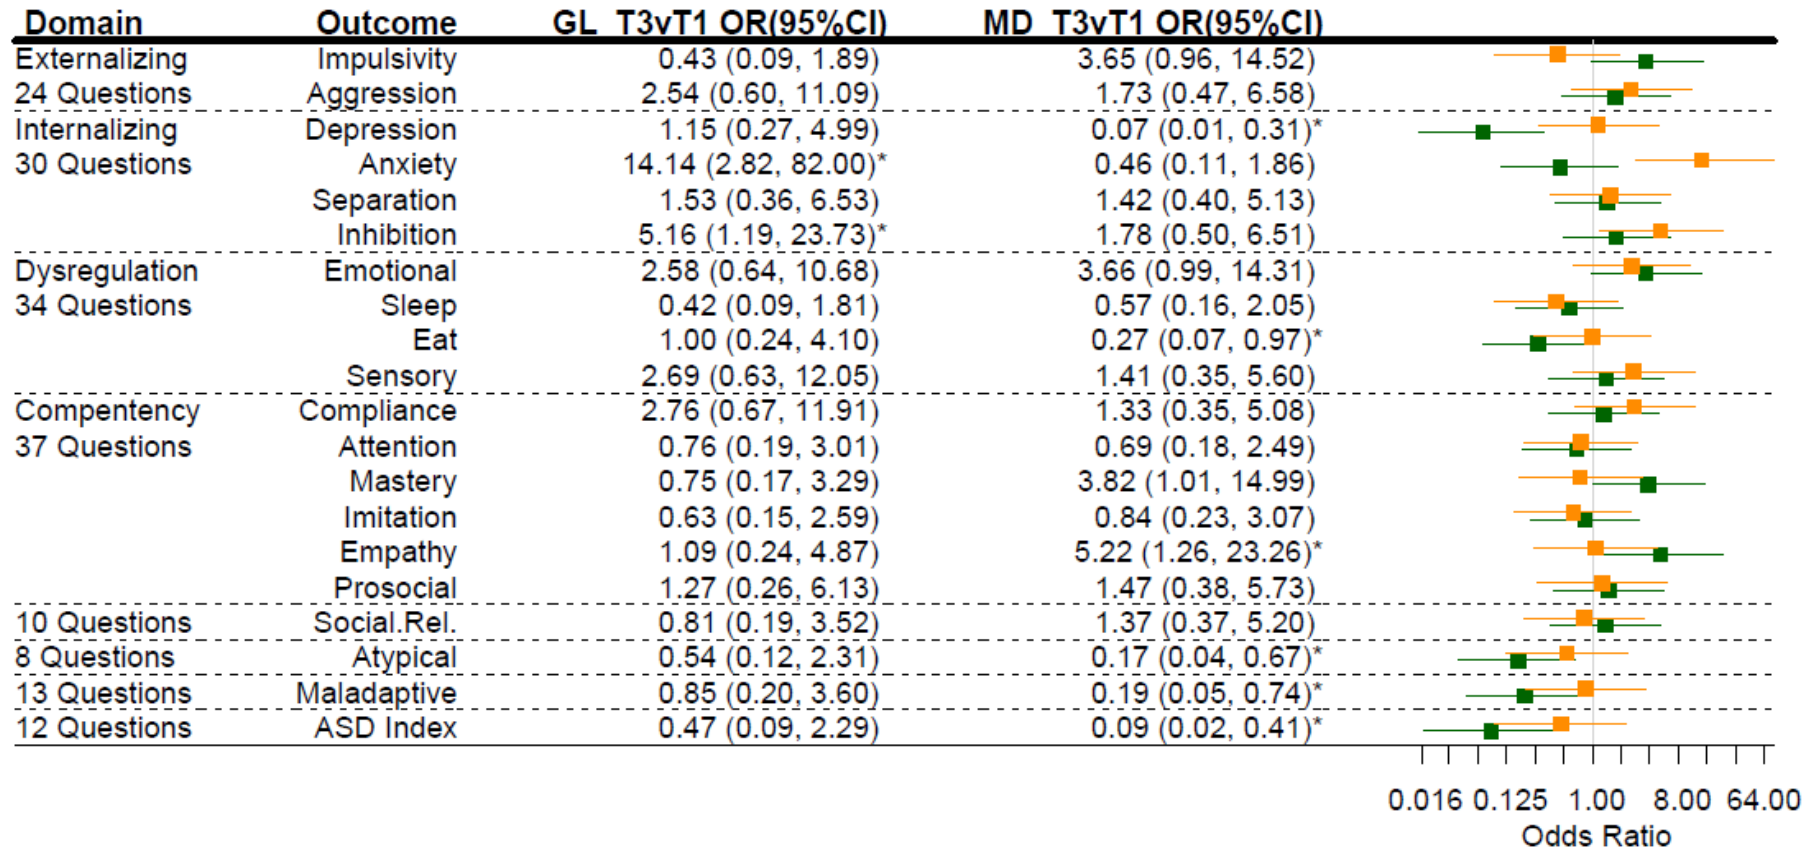

**Figure S2.** Maternal Glycemic Loading Diet and Child Behavior Outcomes in Females. For the 3<sup>rd</sup> tertile of maternal Glycemic Loading compared to the 1<sup>st</sup> (referent), the odds ratio (95% confidence interval) represents the risk of being in a higher tertile of behavioral outcome. Odds ratios (95%CI) are plotted for glycemic loading (orange) and Mediterranean diet (green). Estimates were adjusted for breastfeeding at least 3 months, age of child at behavioral assessment, maternal fiber intake, total calories, folate, education, diabetes, obesity, smoking, race, and age, as well as child parity, premature birth, weight. \*p < 0.05.
